# Supplementary material
Source: PubMed Central journal article supplement (PMC4782805)

**A**

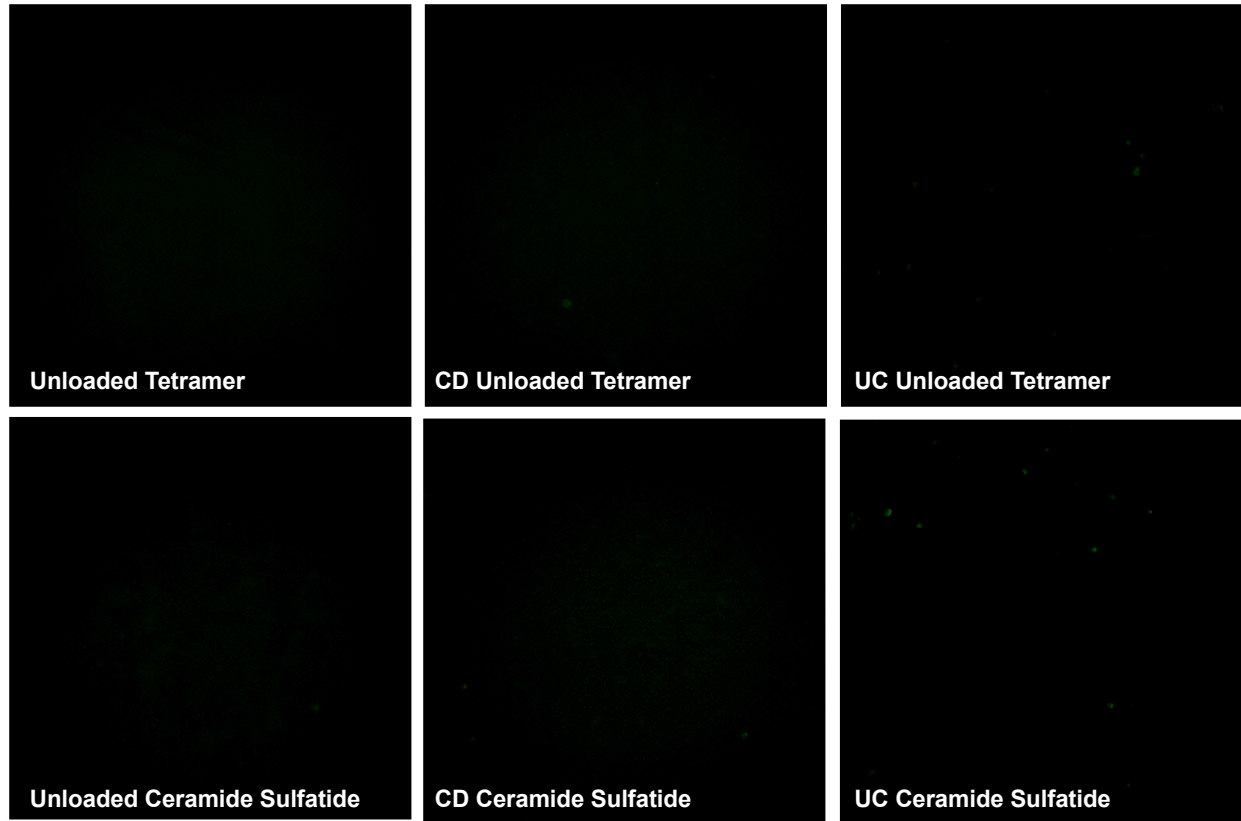

**B**

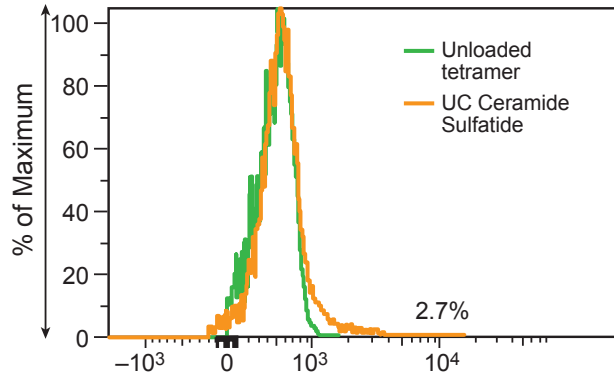

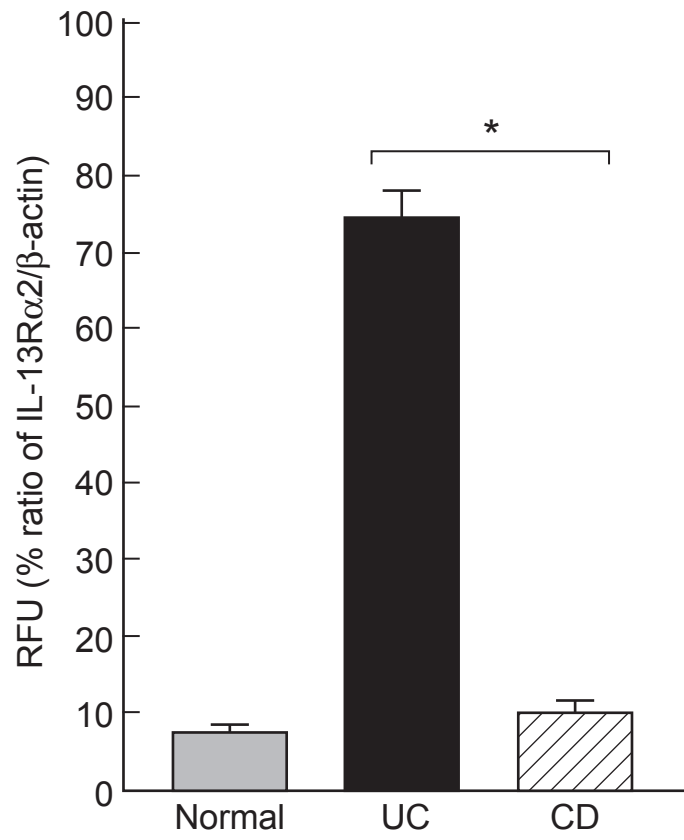

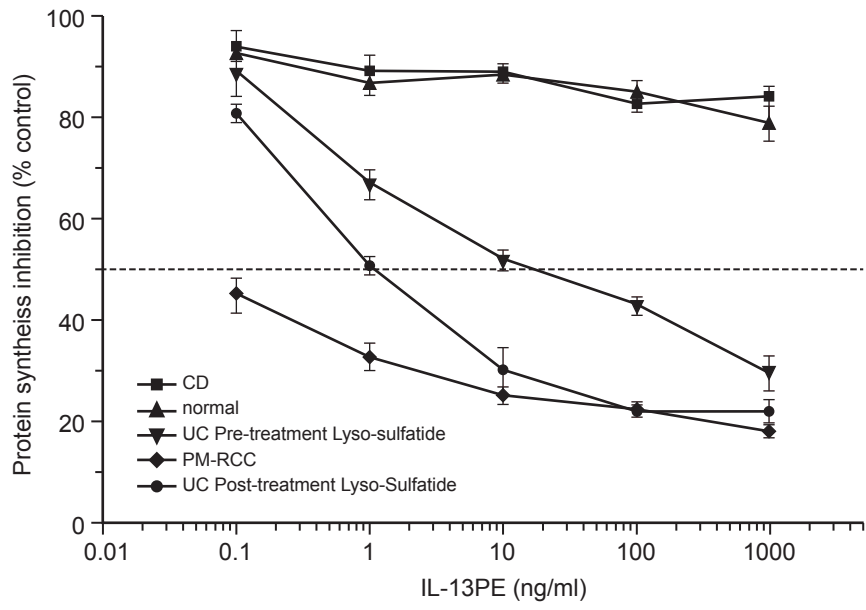

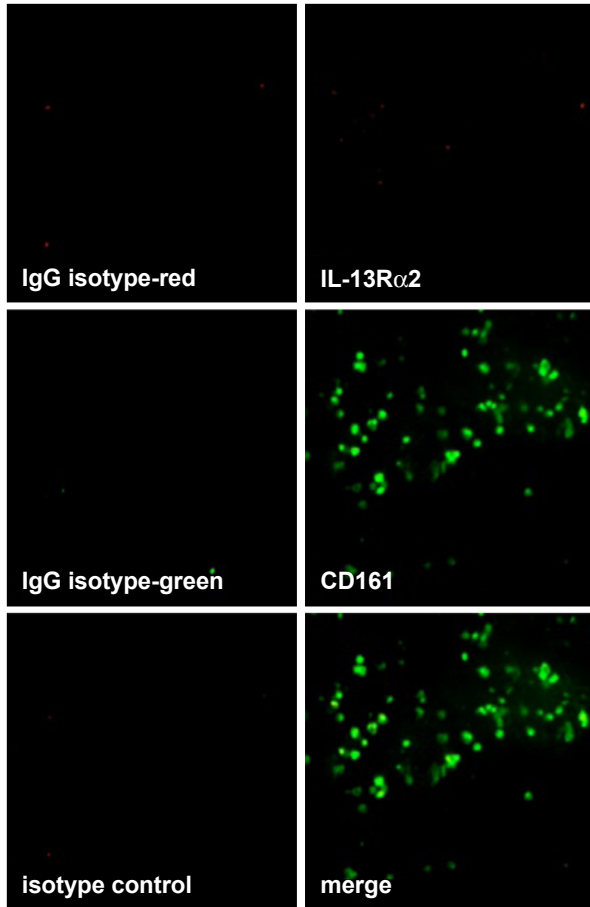

**A**

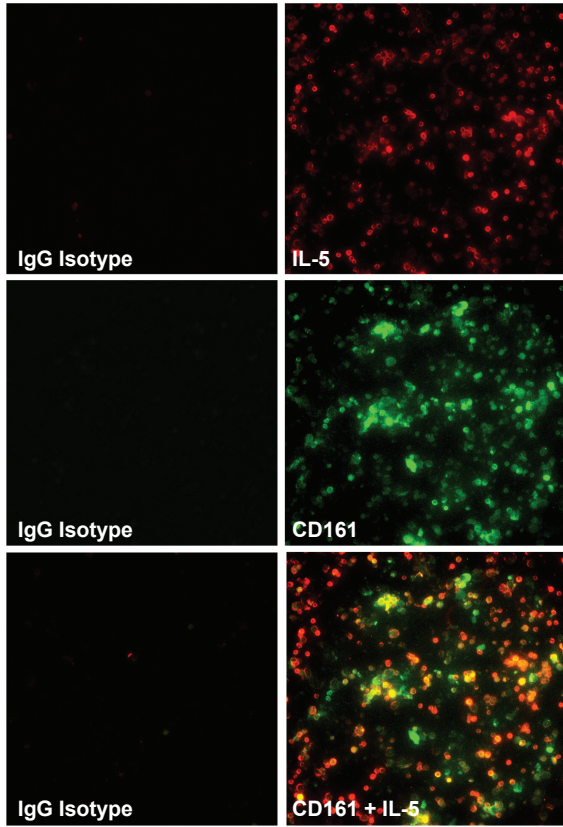

**B**

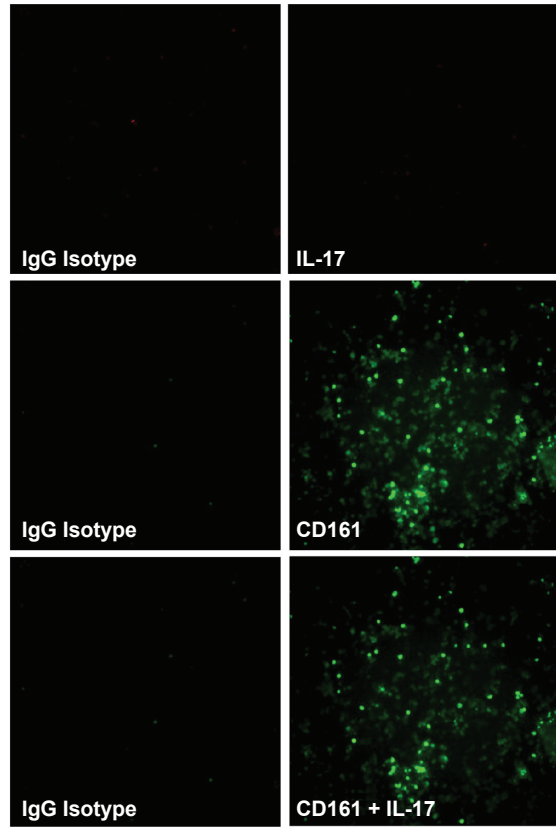

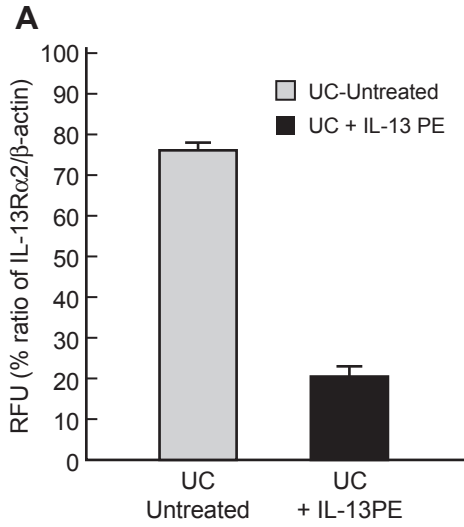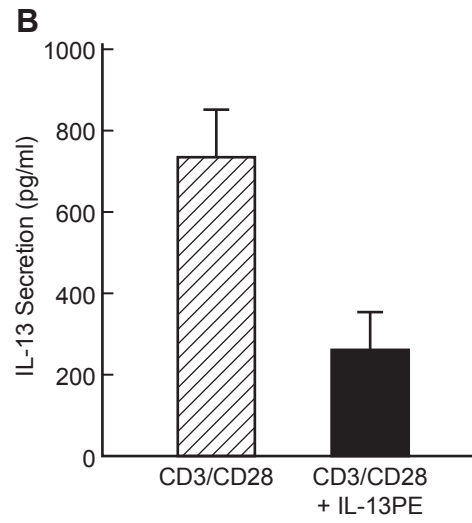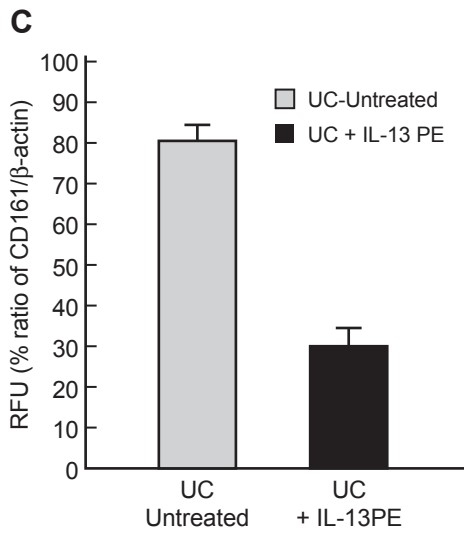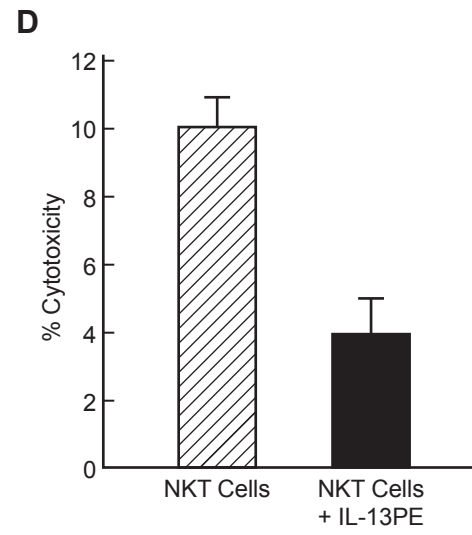

Supplement: NIHMS763814-supplement-Suppl_1-6.pdf [file NIHMS763814-supplement-Suppl_1-6.pdf]
